# Supplementary material for: Concepts for New Rapid Simple HPLC Method for Quantification of Fosfomycin Trometamol in Pharmaceutical Dosage Forms with Direct UV Detection
Source: MDPI journal article supplement (doi:10.3390/scipharm90020035), 2022-05-24
Supplement: s1 [file s1]

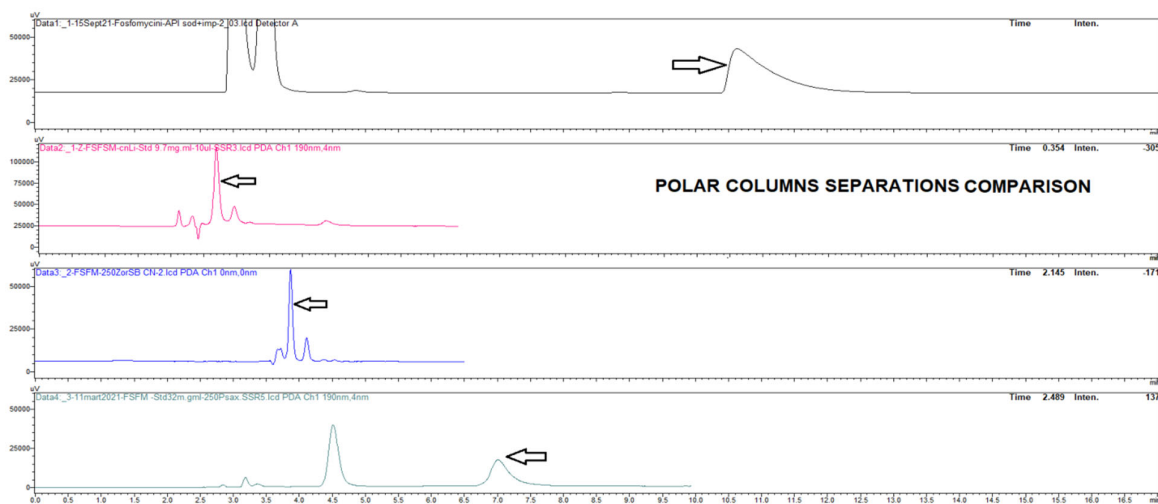

Figure S1. Polar columns separations comparison.

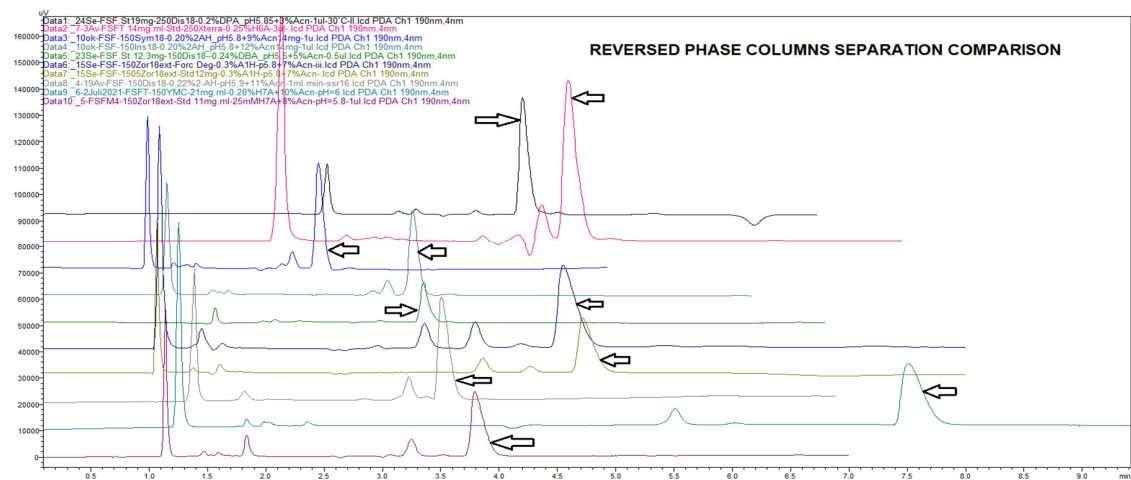

Figure S2. RP-columns separations comparison.

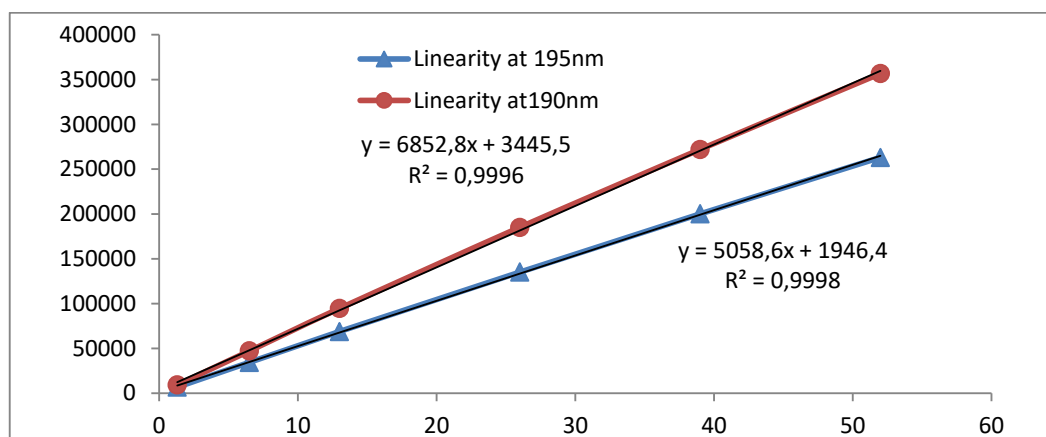

Figure S3. The linearity of UV-response to FSFT in range 1.1-55mg/mL or 1.1-55 ug on column at two different wavelengths with Zorbax SB-CN 250x4.6mm 5um column and acidic phosphate buffer

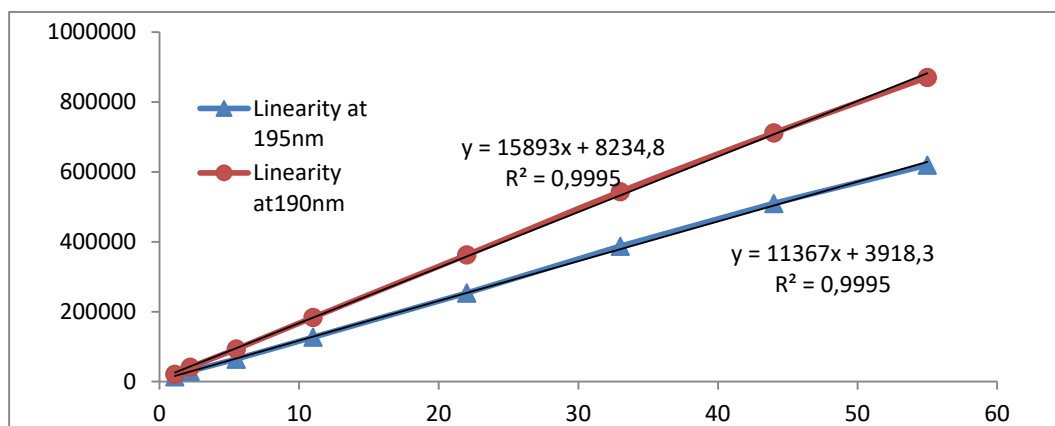

Figure S4. Fosfomycin separation Discovery C18 150x4.6mm 5 $\mu$ m, with mobile phase with 6% can+94% 10mM  $\text{NH}_4\text{H}_2\text{PO}_4$  +0.21% Hexylamine, pH=6.1

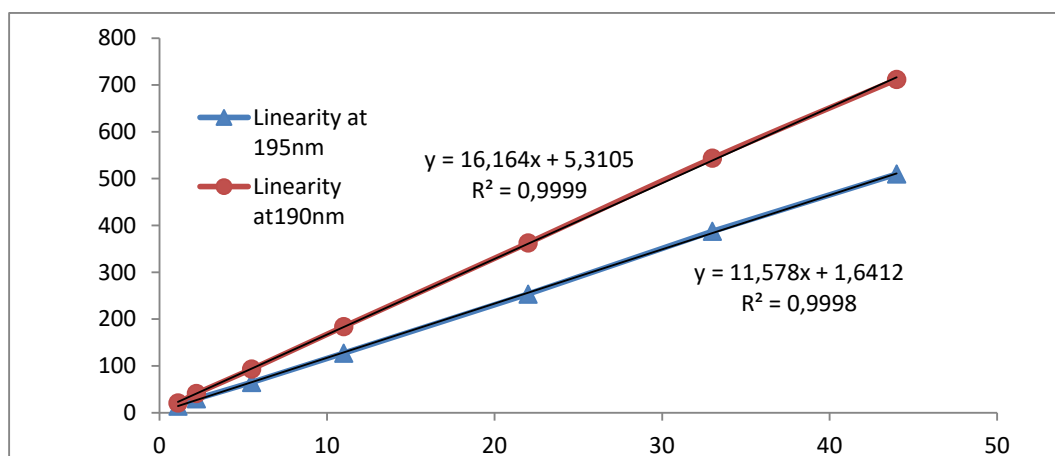

Figure S5. Linearity of peak area ( $Y=mV/min$ ) of method with mobile phase with 2-aminoheptan and Zorbax C18 extend 150 x4.6mm 5 $\mu$ m expressed in mg/mL

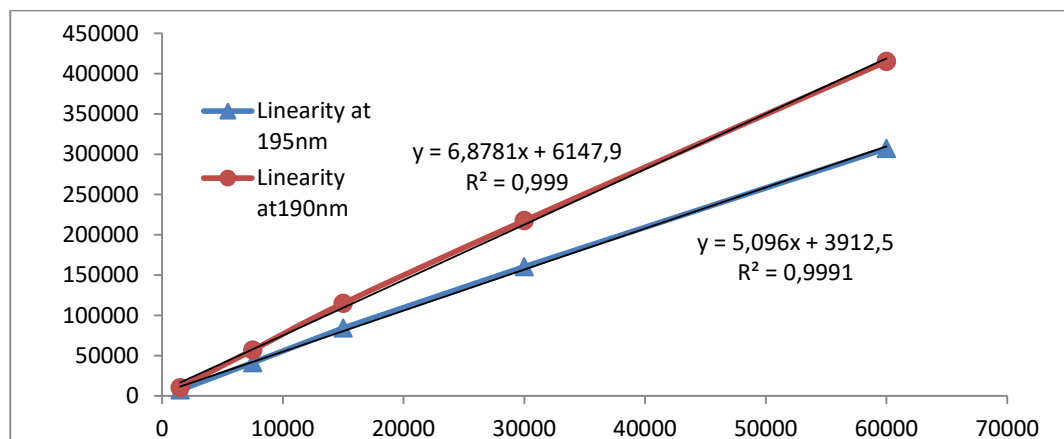

Figure S6. Linearity with 150 x4.6mm 3 $\mu$ m YMC C18 Triart at 1.2 mL/min, FSFT 15mg/mL, 190/195 nm, with mobile phase composed of 0.3% 2-aminoheptane pH=6.05 + 13.5% acetonitrile in mobile phase
